# Supplementary material
Source: Springer Nature journal article supplement (https://www.springermedizin.de/resource/supplementary/12916_2012_712_MOESM4_ESM.pdf/9598728)

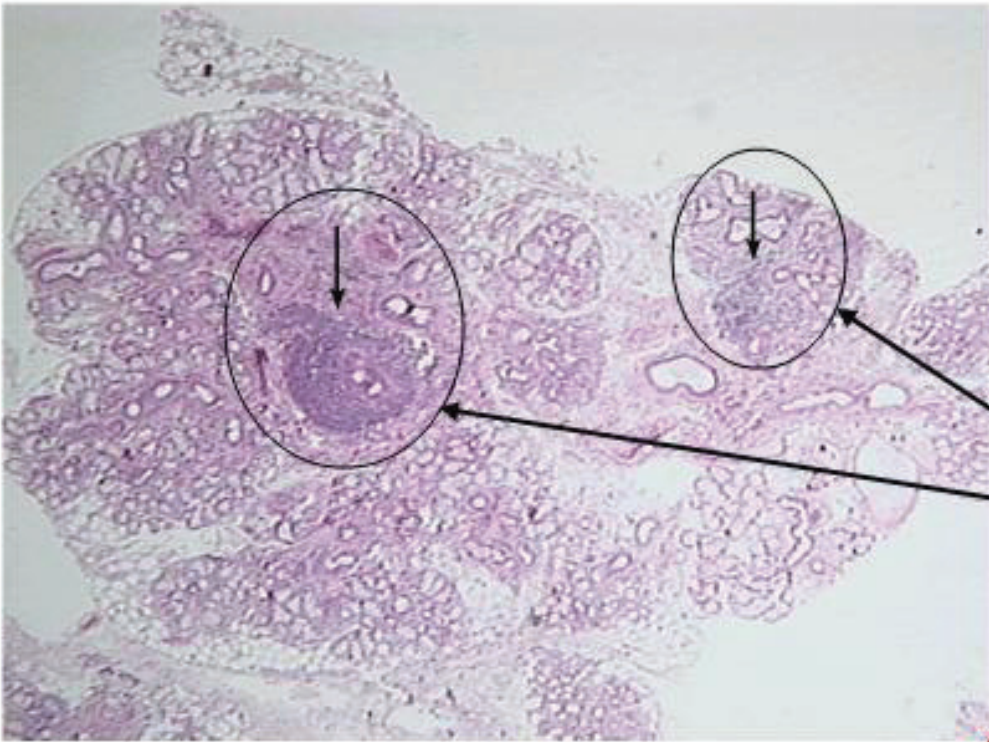

**Periductal lymphoid foci**

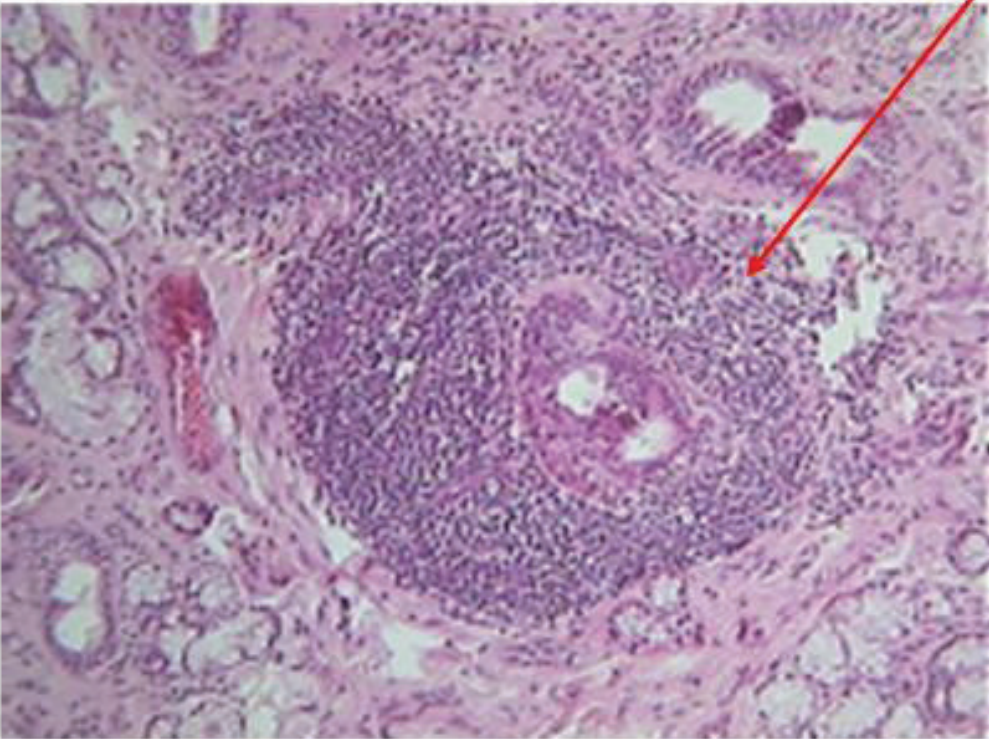

Supplement: MOESM4 [file 9598728]
